# Supplementary material for: Should follow-up cystoscopy be performed in upper-tract urothelial carcinoma patients managed with radical nephroureterectomy after a five-year bladder tumor-free period?
Source: Research Square preprint supplement (doi:10.21203/rs.3.rs-4587966/v1), 2024-07-18
Supplement: Supplementary file 1 [file e4f2311ffb70daab89e4f722.docx]

Table S1 Clinicopathological profiles of UTUC patients who underwent renal transplantation

| Case | Gender | Renal disease | Kidney Transplant Recipient Age | Age diagnosed with UTUC | Characteristics of primary UTUC | Carcinoma In Situ | Prior history of BCa | Concurrent BCa | Bladder recurrence | Treatment of bladder recurrence | Time to bladder recurrence or last follow-up, months |
| --- | --- | --- | --- | --- | --- | --- | --- | --- | --- | --- | --- |
| 1 | female | aristolochic acid nephropathy | 57 | 59 | T2G2 | absent | absent | absent | T3G3 | radical cystectomy | 66 |
| 2 | female | chronic Kidney Disease | 56 | 66 | T2G2 | absent | absent | absent | absent | NA | 88 |
| 3 | male | chronic Kidney Disease | 30 | 38 | T3G3 | absent | absent | absent | absent | NA | 63 |
| 4 | female | aristolochic acid nephropathy | 58 | 63 | TaG2 | absent | absent | TaG2 | absent | NA | 86 |
| 5 | female | chronic Kidney Disease | 43 | 57 | T3G3 | absent | absent | absent | absent | NA | 71 |
| 6 | female | chronic Kidney Disease | 56 | 64 | T3G3 | absent | absent | absent | absent | NA | 119 |
| 7 | female | chronic Kidney Disease | 47 | 56 | T1G2 | absent | absent | absent | absent | NA | 68 |
| 8 | female | chronic Kidney Disease | 44 | 52 | T2G3 | absent | TaG3 | absent | Ta | TURBT | 94 |
| 9 | male | aristolochic acid nephropathy | 69 | 71 | T1G2 | present | absent | absent | T1G2 | TURBT | 62 |
| 10 | female | aristolochic acid nephropathy | 49 | 62 | T2G3 | absent | absent | absent | absent | NA | 95 |
